# Supplementary material
Source: publisher figshare collection journal article supplement (https://karger.figshare.com/ndownloader/files/8252813)
Supplement: Supplementary file 1 [file 8252813]

**Molecular cloning, sequence characterization and expression of recombinant buffalo  
Leukemia Inhibitory Factor (LIF) gene in COS-1 cell line**

**Cytogenetics and Genome Research**

**Gurjeet Kaur<sup>1</sup>, Syed Azmal Ali<sup>1</sup>, Shikha Pachauri<sup>1</sup>, Ashok K. Mohanty<sup>1</sup>,  
Sudarshan Kumar<sup>1</sup>**

**<sup>1</sup>National Dairy Research Institute, Karnal**

**Address for correspondence:**

Dr. Sudarshan Kumar  
Scientist- Animal Biotechnology Center  
National Dairy Research Institute  
Karnal - 132001  
Haryana, India  
E-mail: kumarsudershan@gmail.com

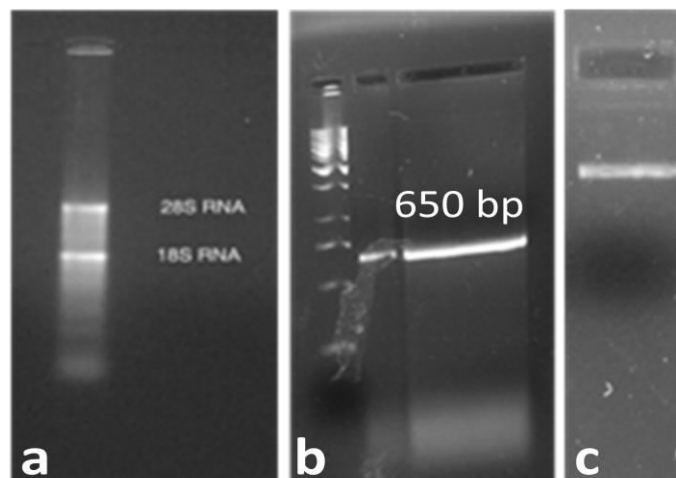

**Fig. S1** PCR amplification of BuLIF and confirmation of recombinant plasmid. a) RNA isolated from cumulus oophorus cells of buffalo oocyte. b) PCR amplification of 650 bp long BuLIF. c) Purified LIF gene for cloning in an expression vector.

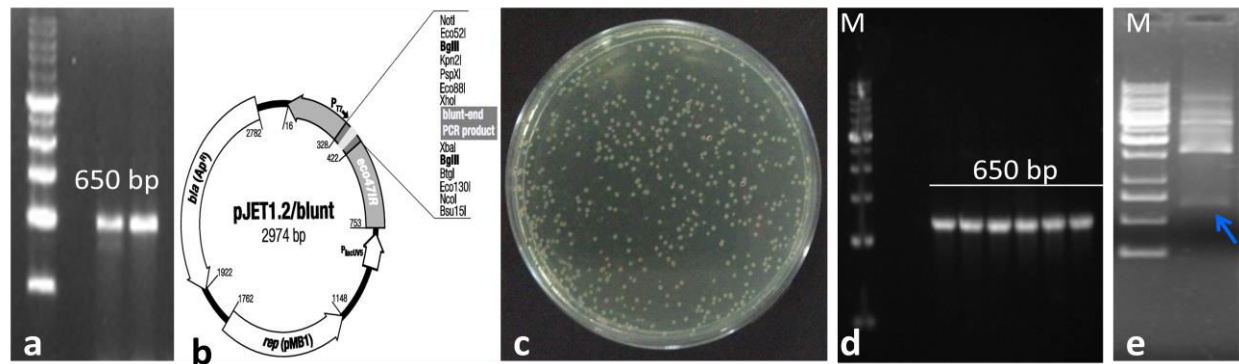

**Fig. S2** Molecular cloning of Buffalo LIF gene: a) M marker and 2 PCR product of Buffalo LIF, b) pJET1.2/blunt vector c) Ampicillin resistant colonies of *E. coli* having LIF insert and d) PCR analysis for confirmation of LIF insert in ampicillin resistant *E. coli* colonies, 1 kb DNA ladder (Lane M) and PCR products of LIF amplified from the plasmids isolated from ampicillin resistant *E. coli* colonies (Lane 1 –6) e) Released LIF DNA fragment from recombinant plasmid by BglII digestion represented by blue arrow.

#### Forward Primer

CTCTGGAGTGCAGCCCATATGAAGGTCTTGGCGGCAGGAGTCGTGCCCTGCTG  
CTGGTTCTCCACTGGAAACACGGGGCCGGGAGCCCCCTTCCCATCACCCCGGTCA  
ACGCTACCTGTGCCACCCGCCATCCCTGTCCCAGCAACCTCATGAACCAGATCAG  
AAACCAGCTGGGACAACCTCAACAGCAGTGCCAACAGCCTCTTTATCCTCTATTAC  
ACGGCCCAGGGGGAGCCCTTCCCCAACAACTGGACAAGCTGTGCAGCCCCAACG  
TGACTGACTTCCCGCCCTTCCACGCCAACGGCACGGAGAAGGCCCGGCTGGTGGA  
GCTGTACCGCATCATAGCGTACCTGGGCGCCTCCCTGGGCAACATCACGCGGGAC  
CAGAAGGTCCTCAACCCCTACGCCACGGCCTGCACAGCAAGCTGAACACCACGG  
CTGACGTCCTGCGGGGTCTTCTCAGCAACGTGCTCTGCCGCTTGTGCAGCAAGTA  
CCACGTGAGCCACGTGGACGTGACCTACGGCCCCGACACCTCGGGCAAGGACGTC  
TTCAGAGAAGAAGCTGGGCTGTCAGCTCCTGGGGAAGTACAAGCAGGTCATCG  
CCGTGCTGGCCCAGGCCTTCTAGACGGGAGGTCTTAGATAGTAGG

#### Reverse Primer

**Fig. S3a:** Nucleic acid sequence of LIF gene in buffalo. The amplified LIF gene is 650 bp with an ORF of 609 bases (Shown in blue color). Sequences underlined represents forward and reverse primers respectively (Shown in green color). Start and stop codon is represented in red color bases.

MKVLAAGVVPLLLVLHWKHGAGSPLPITPVNATCATRHPCPSNLMNQIRNQLGQLNSSA  
NSLFILYYTAQGEPPNLDKLCSPNVTDFPPFHANGTEKARLVELYRIIAYLGASLGNITR  
DQKVLNPNYAHGLHSLNNTADVLRGLLSNVLCRLCSKYHVSHVDVITYGPDTSKGKDVFK  
KKLGCQLLGKYKQVIAVLAQAF

**Fig. S3b:** Translated amino acid sequence of LIF in buffalo. The initial 22 amino acids represent signal peptide indicated through black line bar. The mature peptide starting from 23<sup>rd</sup> amino acid (serine) is made of 180 amino acids.



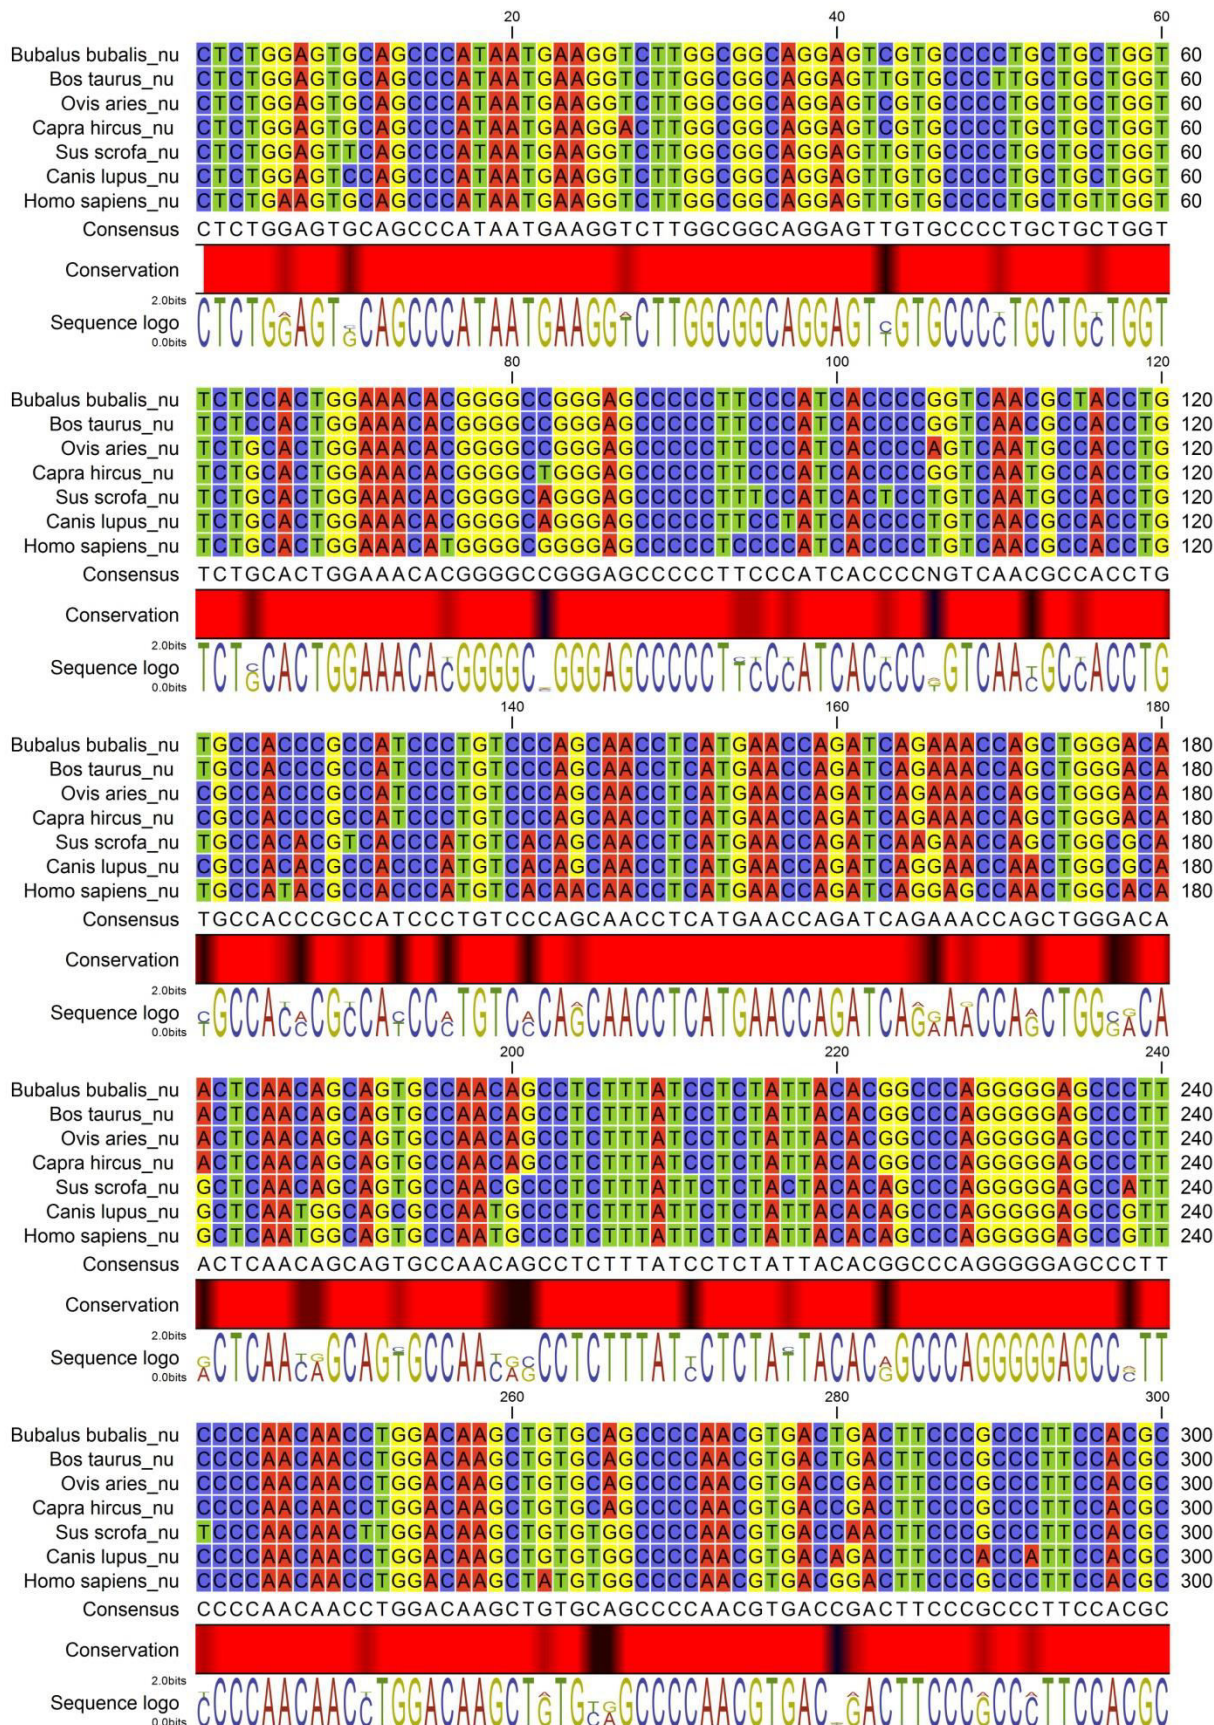



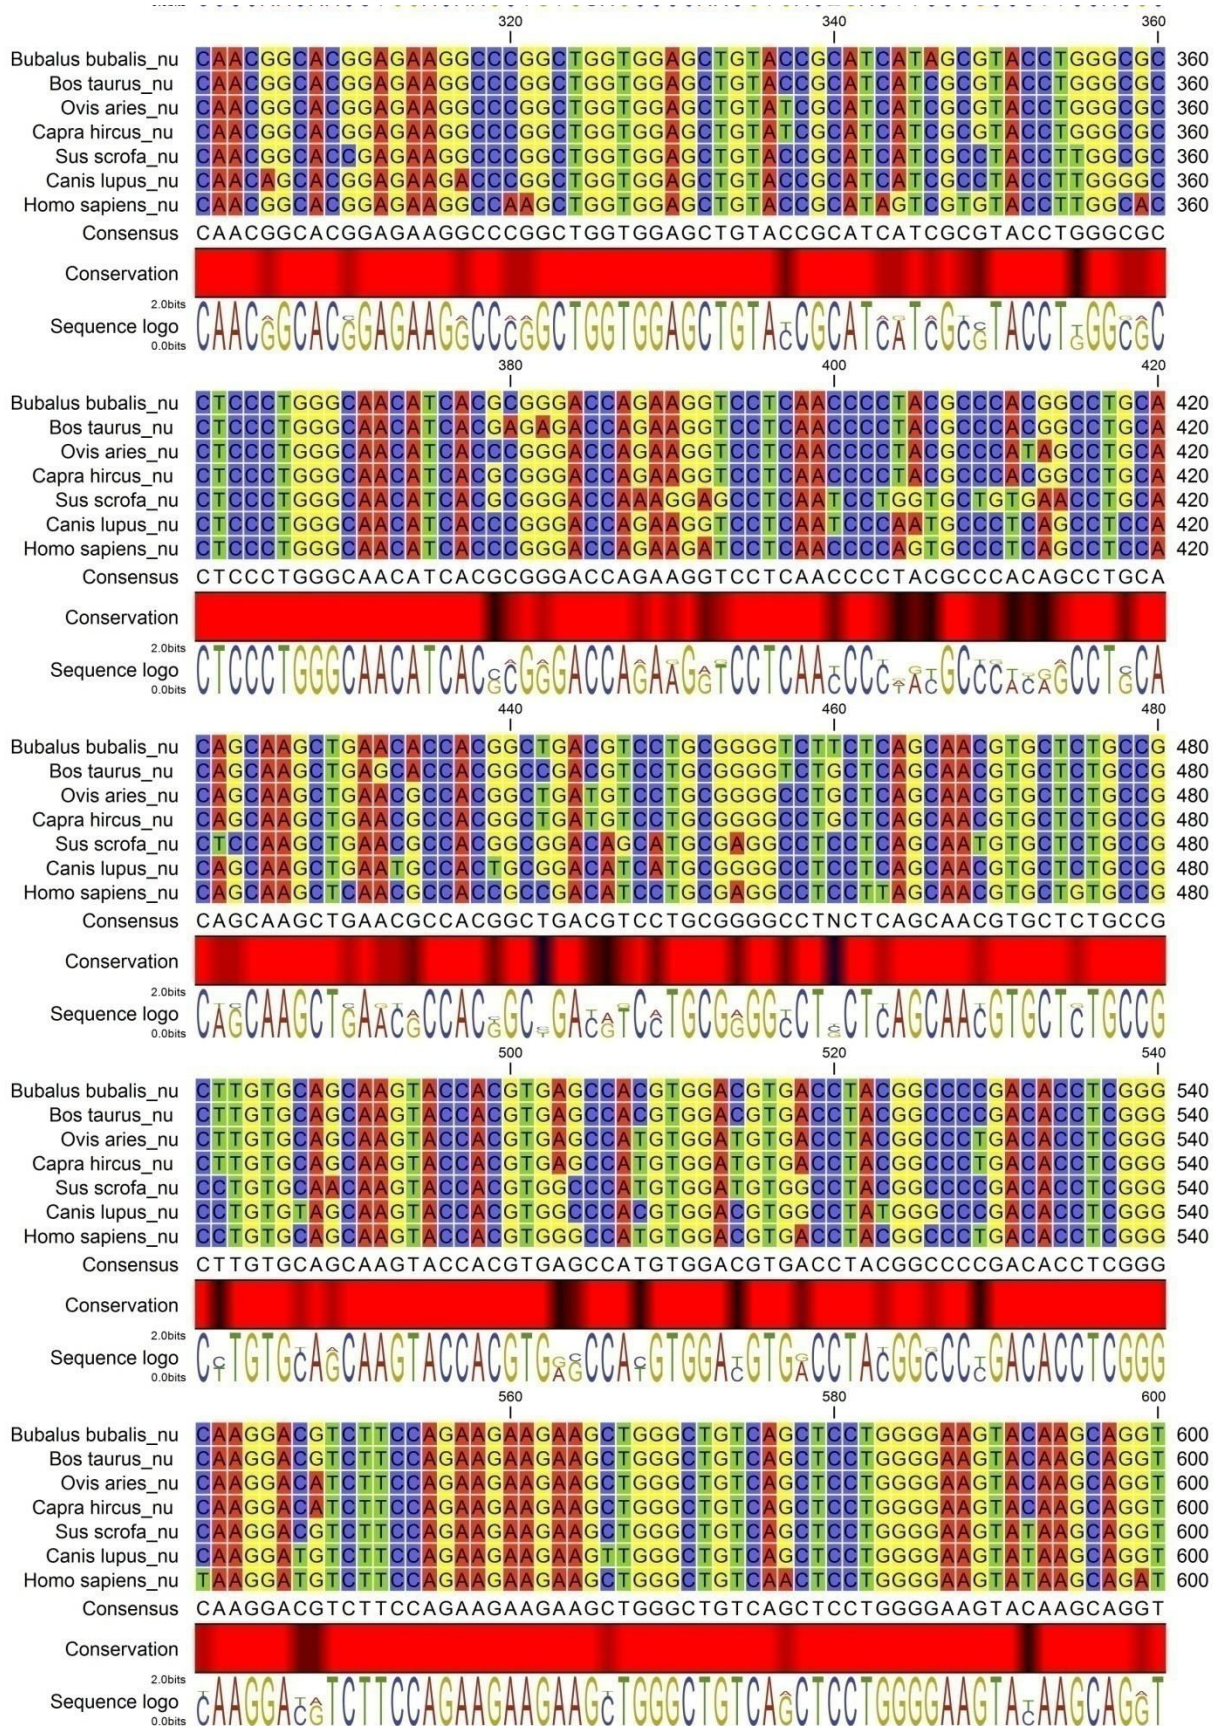

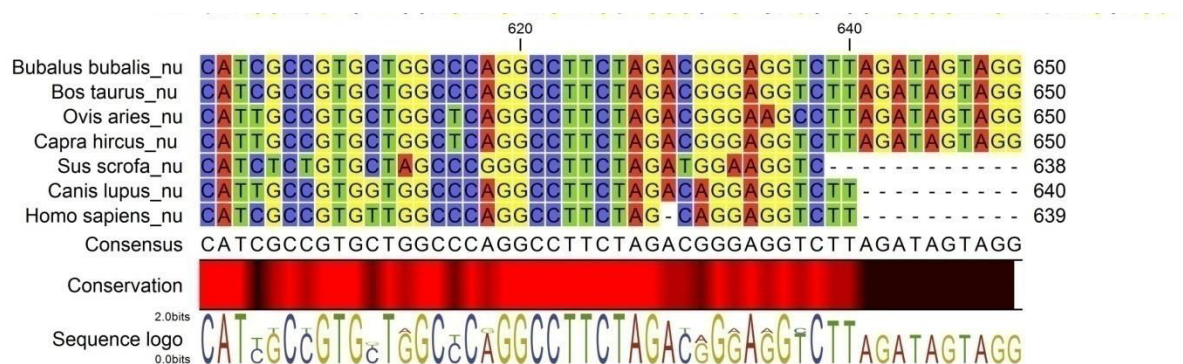

**Fig. S4.** Multiple Sequence alignment of Leukemia inhibitory factor gene. Conservation bar showing the conserved sequence in the form of the heat map. Dark red is a highly conserved region in sequences.



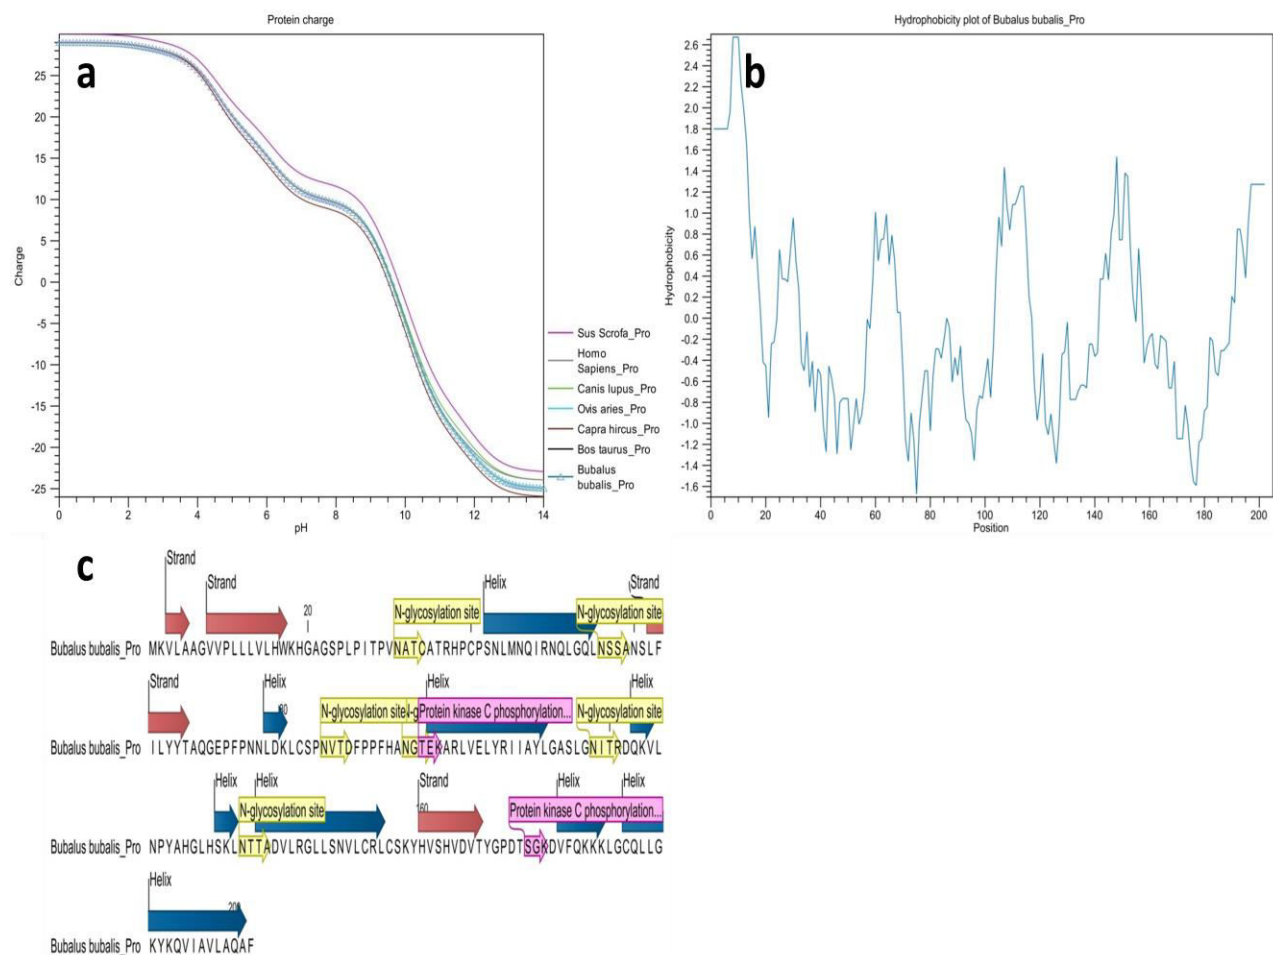

**Fig. S5** a) Charge plot of all predicted and translated proteins. b) Hydrophobicity plot of predicted BuLIF. c) BuLIF representing the presence of secondary structure and theoretical sites available for post-translation modification.

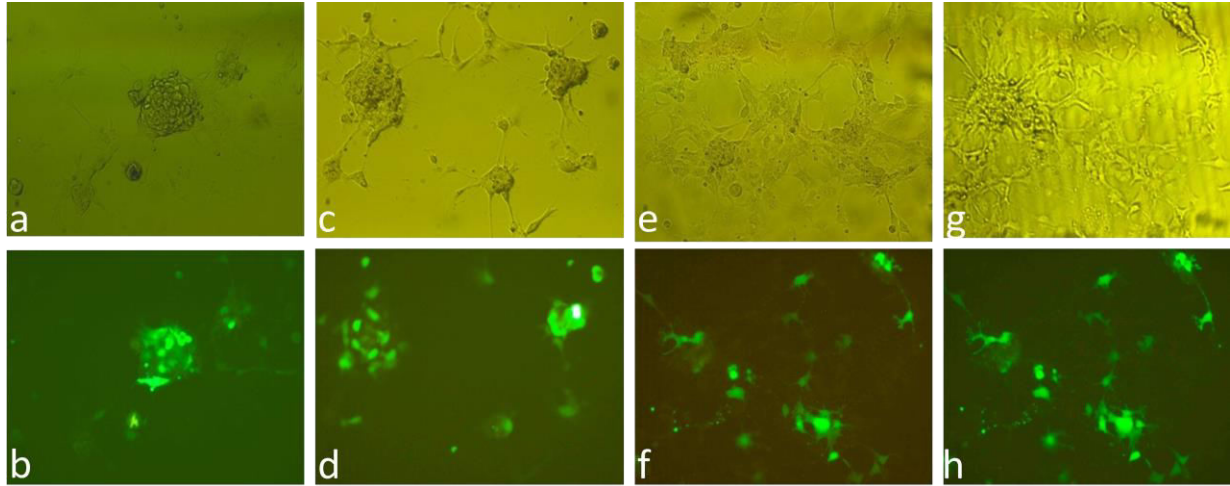

**Fig. S6** Single cell colonies of stably transfected cells used for expansion and further selection of transfected cells. Transfected cell colonies were taken from different passages and cultured separately for stable selection. From left to right sequentially represents a-b 10<sup>th</sup>, c-d 12<sup>th</sup>, e-f 16<sup>th</sup>, and g-h 20<sup>th</sup> passage respectively. Transfected COS-1 cells in UV light expression GFP (b, d, f, h) and in bright light (a, c, e, g).

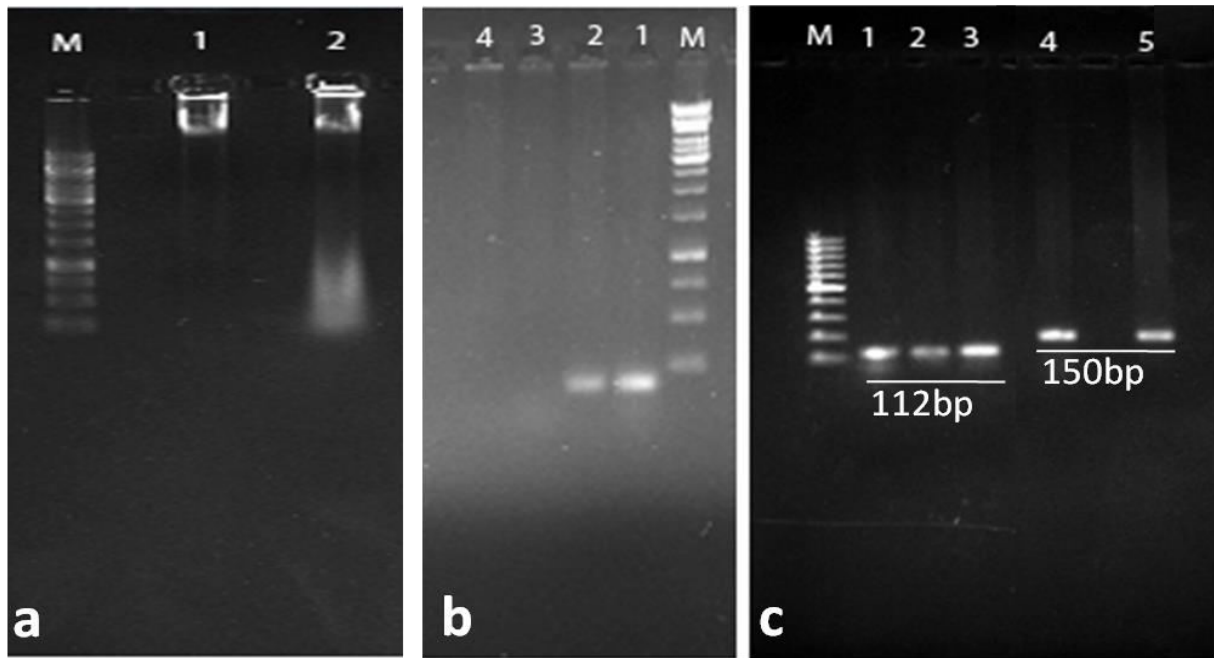

**Fig. S7 Confirmation of genomic integration of BuLIF in COS-1 cells genome** a) M DNA Marker, Lane-1: Genomic DNA was isolated from 50<sup>th</sup> passage transfected COS-1\_BuLIF cell line, Lane-2: Isolated genomic DNA from a normal COS-1 cell line. b) M DNA marker, Lane-1 and 2: PCR amplified product from transfected COS-1\_BuLIF cells, Lane-3 and 4: NO PCR amplification occurred in normal COS-1 cells. c) M: DNA marker, Lane-1 to 3 PCR amplification of BuLIF sequence by genomic DNA of transfected COS-1\_BuLIF cells using RT-BuLIF primers (112bp), Lane-4 and 5: PCR amplification of GFP by genomic DNA of transfected COS-1\_BuLIF cells using RT-GFP primers (150bp).

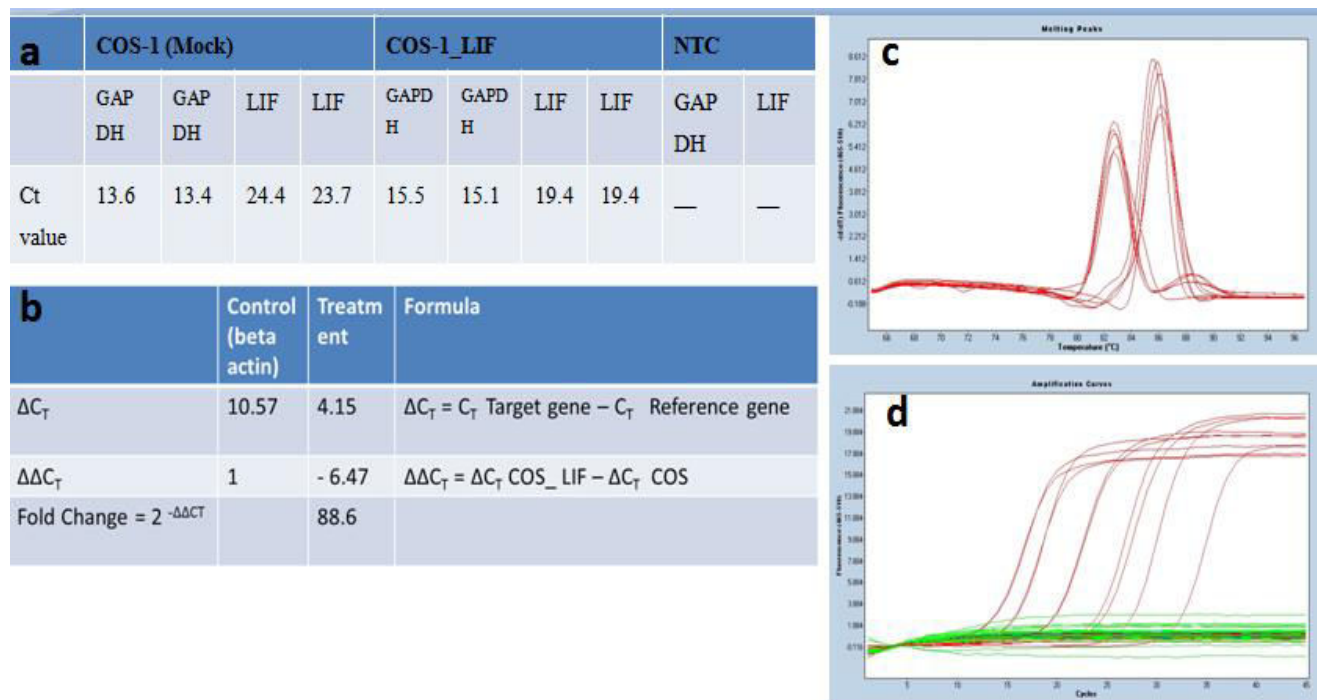

**Fig. S8** a) Ct values of GAPDH and LIF gene in empty COS-1, COS1\_BuLIF, and NTC. b) The calculated fold change of expression of rBuLIF transcripts by real-time quantitative qRT-PCR c) Melting curve for GAPDH and BuLIF gene. d) Amplification plot for GAPDH and BuLIF gene.

**Supplementary Table 1.** Position of secondary structure in BuLIF predicted protein

| Start | End | Region name |
|-------|-----|-------------|
| 3     | 5   | beta strand |
| 8     | 17  | beta strand |
| 42    | 55  | alpha helix |
| 62    | 68  | beta strand |
| 78    | 80  | alpha helix |
| 98    | 112 | alpha helix |
| 123   | 125 | alpha helix |
| 135   | 137 | alpha helix |
| 140   | 155 | alpha helix |
| 160   | 167 | beta strand |
| 177   | 182 | alpha helix |
| 185   | 201 | alpha helix |
